# Supplementary material
Source: PubMed Central journal article supplement (PMC5337120)
Supplement: NIHMS822245-supplement-Supplemental_figures_and_supplementary_information.pdf [file NIHMS822245-supplement-Supplemental_figures_and_supplementary_information.pdf]

SUPPLEMENTAL DATA

Figure S1

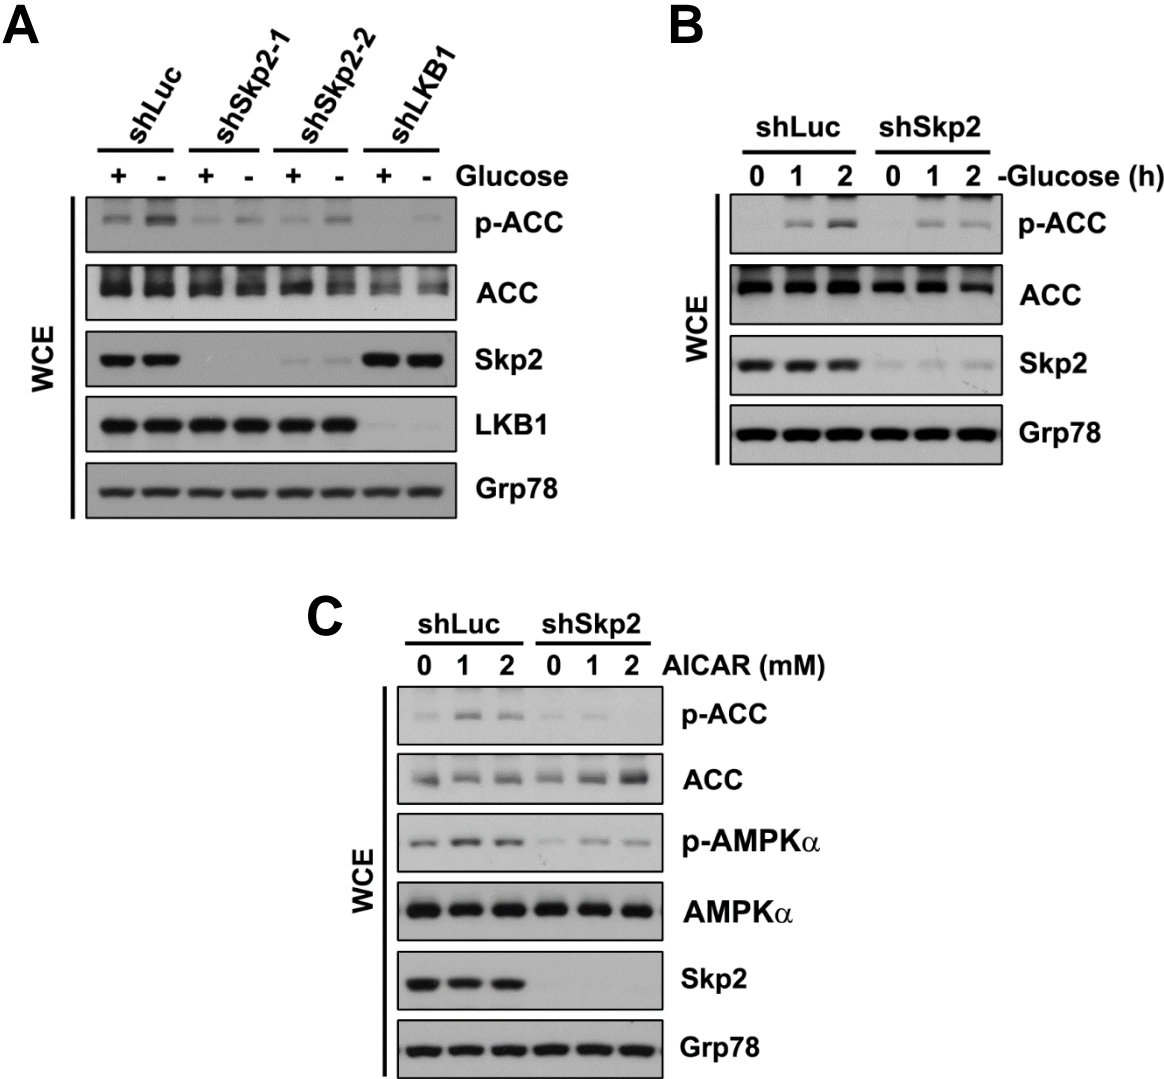

**Figure S1, related to Figure 1. Skp2 knockdown attenuates the LKB1/AMPK signaling.**

(A) BT-474 cells with control (shLuc), Skp2 or LKB1 knockdown cultured in the presence (+) or absence (-) of glucose were subjected to immunoblotting. WCE, whole cell extracts.

(B) MCF-7 cells with control (shLuc) or Skp2 knockdown cultured in the absence of glucose for the indicated time points were subjected to immunoblotting.

(C) HEK293T cells with control (shLuc) or Skp2 knockdown after treatment with AICAR at the indicated concentrations for 1 hour were subjected to immunoblotting.

Figure S2

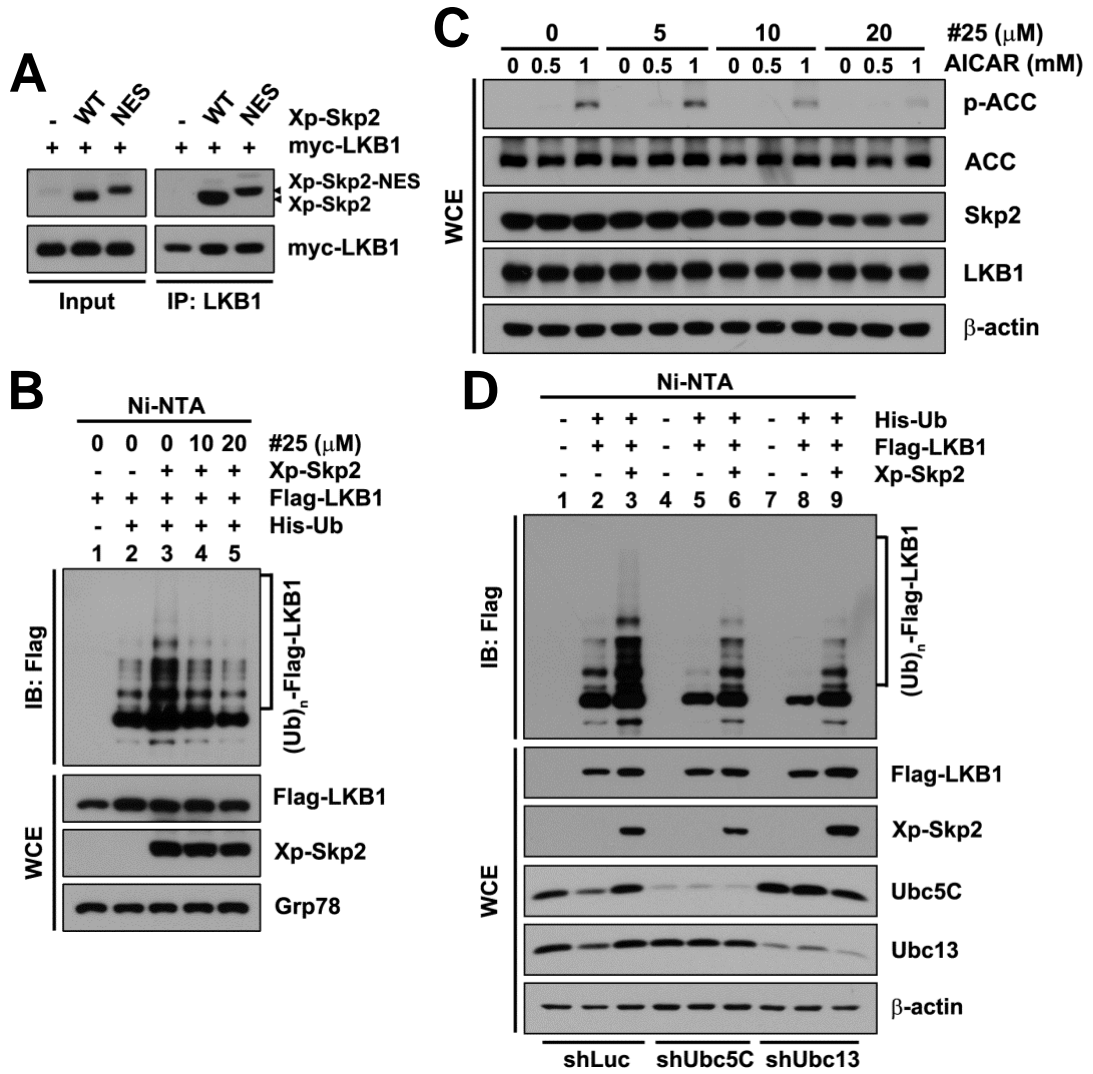

**Figure S2, related to Figure 2. Analysis of Skp2-mediated LKB1 polyubiquitination.**

(A) Immunoprecipitates by anti-LKB1 antibody from HEK293T cells transfected with the indicated plasmids were subjected to immunoblotting.

(B) *In vivo* ubiquitination assay in HEK293T cells transfected with the indicated plasmids and treated with the Skp2 inhibitor (compound #25) at the indicated concentrations was followed by immunoblotting. Ni-NTA, nickel bead precipitates.

(C) Hep3B cells pretreated with the Skp2 inhibitor (compound #25) at the indicated concentrations for 24 hours were subjected to AICAR treatment at the indicated concentrations for 2 hours, followed by immunoblotting.

(D) *In vivo* ubiquitination assay in HEK293 cells with control (shLuc), Ubc5C or Ubc13 knockdown transfected with the indicated plasmids was followed by immunoblotting.

Figure S3

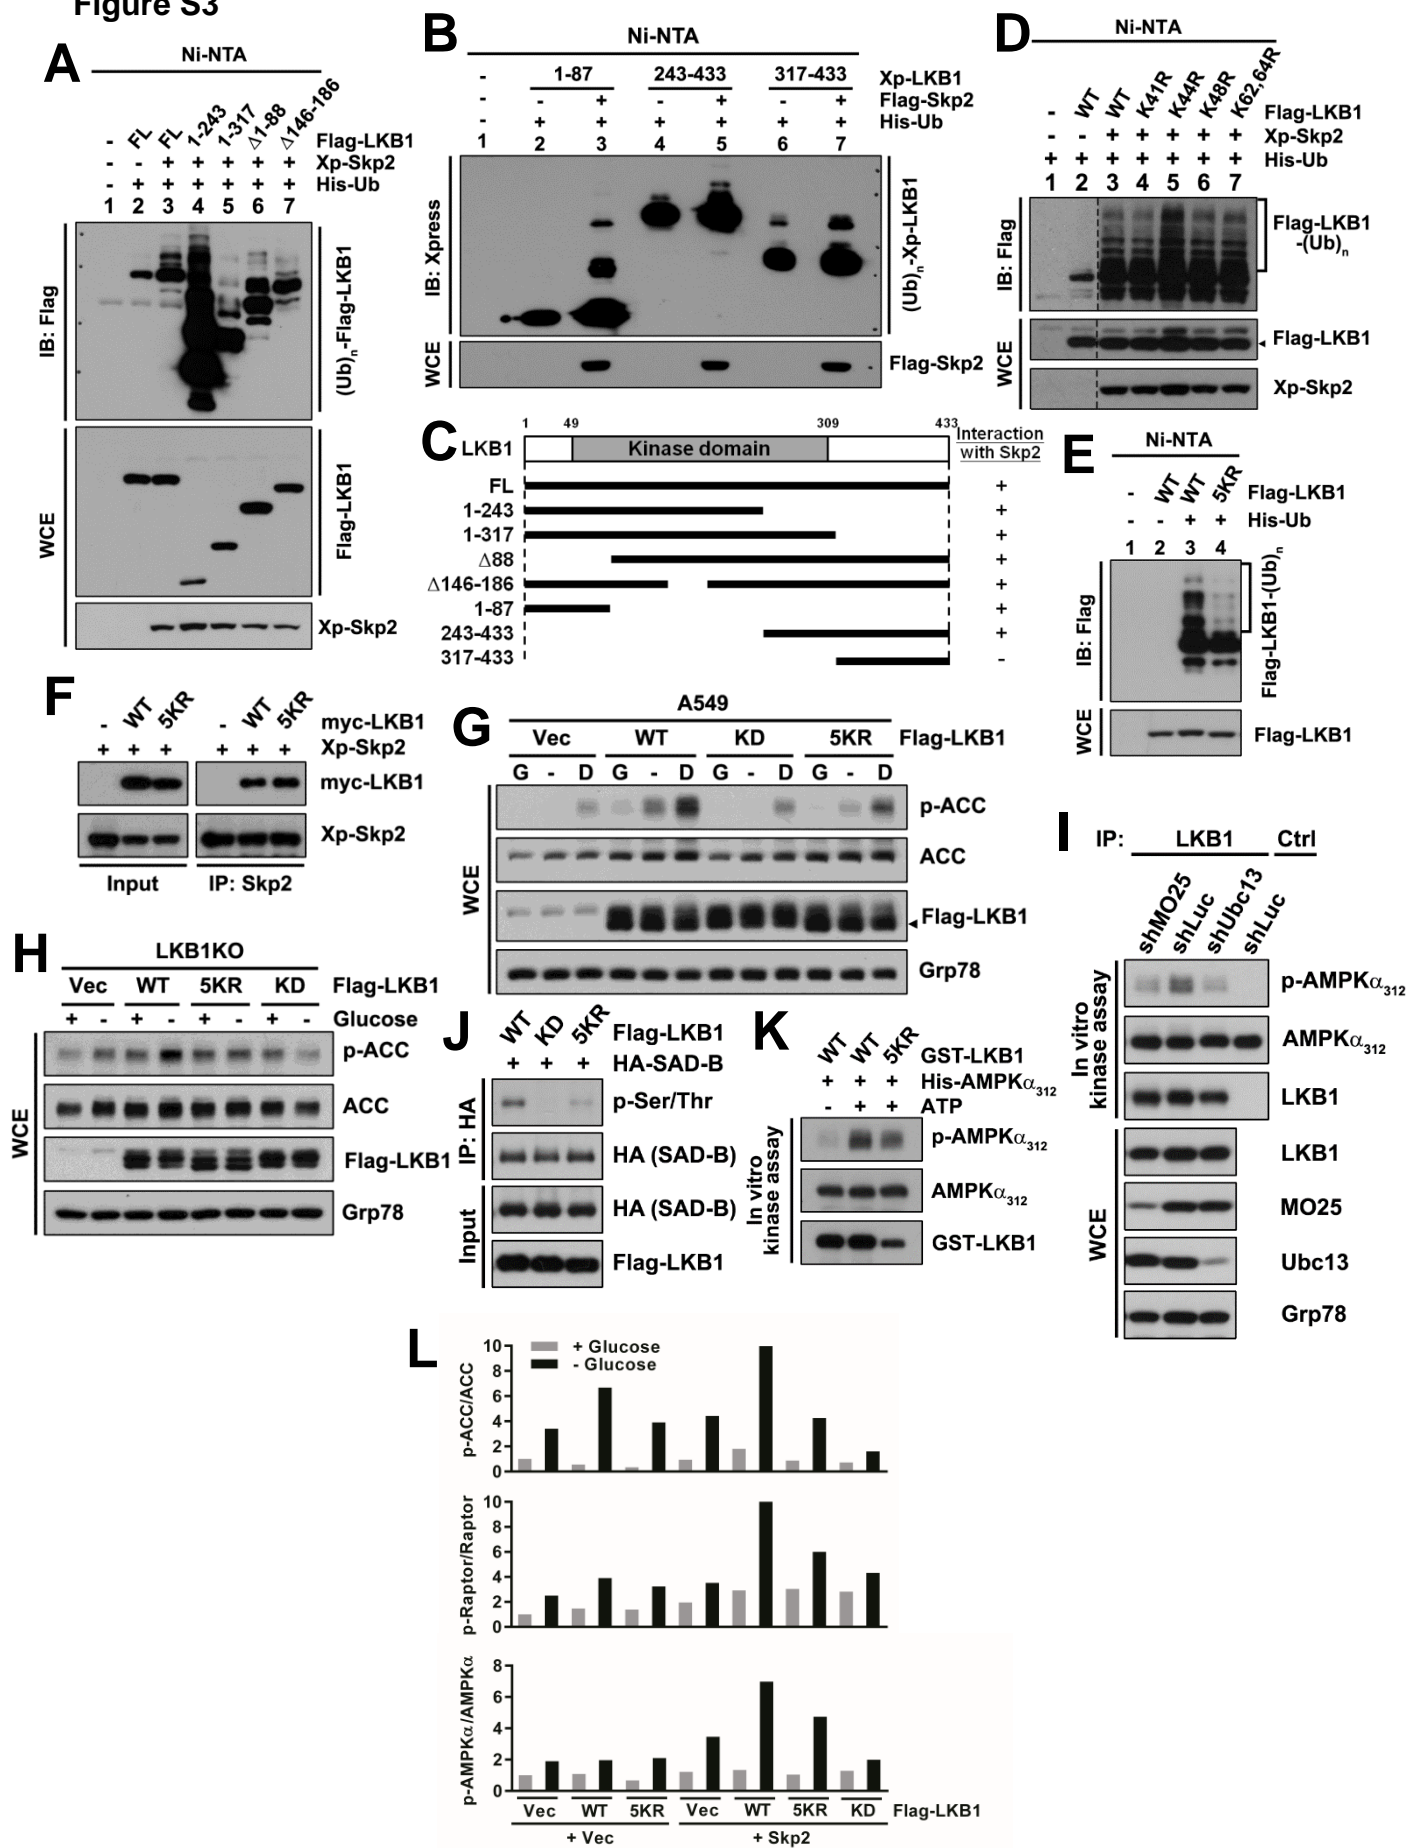

**Figure S3, related to Figure 3. Identification of LKB1 polyubiquitination-deficient mutant.**

(A, B) *In vivo* ubiquitination assays in HEK293T cells transfected with the constructs expressing the indicated fragments of tagged-LKB1 and the other indicated plasmids were followed by immunoblotting. FL, full length.

(C) A diagram summary of the interaction between Skp2 and the different fragments of LKB1 in (A) and (B) based on the results of co-immunoprecipitation assays.

(D, E) *In vivo* ubiquitination assays in HEK293T cells transfected with the constructs expressing the indicated mutant forms of Flag-LKB1 and the other indicated plasmids were followed by immunoblotting.

(F) Immunoprecipitates by anti-Skp2 antibody from HEK293T cells transfected with the indicated plasmids were subjected to immunoblotting.

(G) LKB1-deficient A549 cells with stable reconstitution of the indicated Flag-LKB1 cultured with or without glucose, or treated with 5mM 2-DG for 2 hours were subjected to immunoblotting. G, with glucose; -, without glucose; D, with 2-DG.

(H) *LKB1*-KO MEFs with stable reconstitution of the indicated Flag-LKB1 cultured in the presence (+) or absence (-) of glucose for 2 hours were subjected to immunoblotting.

(I) Immunoprecipitates by anti-IgG control or anti-LKB1 antibody from HEK293T cells with control (shLuc), Ubc13 or MO25 knockdown were subjected to *in vitro* LKB1 kinase assay followed by immunoblotting.

(J) Immunoprecipitates by anti-HA antibody from HEK293T cells transfected with HA-SAD-B and the indicated Flag-LKB1 were subjected to immunoblotting.

(K) *In vitro* kinase assay, in which the indicated recombinant GST-LKB1 was incubated with recombinant His-AMPK $\alpha_{1-312}$  (substrate) in the presence (+) or absence (-) of ATP for reaction, was followed by immunoblotting.

(L) Semi-quantification analysis of Figure 3E. Hep3B cells with stable transduction of vector (Vec) or Skp2 along with the indicated Flag-LKB1 cultured in the presence (+) or absence (-) of glucose were subjected to immunoblotting. The band intensity of phospho-proteins was normalized to that of total proteins. The relative ratios are shown in bar graphs, and the ratios in cells transduced with vector only in the presence of glucose (the first lane) were set as 1.



**Figure S4, related to Figure 4. Characterization of Skp2-mediated LKB1 polyubiquitination.**

(A) HEK293T cells transfected with the indicated Flag-LKB1 and HA-AMPK $\alpha$  constructs were subjected to immunoprecipitation with anti-Flag antibody followed by immunoblotting.

(B) HEK293 cells with control (shLuc) or Skp2 knockdown transfected with Flag-LKB1 and the indicated HA-AMPK $\alpha$  constructs were subjected to immunoprecipitation with anti-Flag antibody followed by immunoblotting.

(C) Immunoprecipitates by anti-HA antibody from HEK293T cells transfected with HA-SAD-B and the indicated Flag-LKB1 were subjected to immunoblotting.

(D) Immunoprecipitates by anti-Flag antibody from cytosolic fractions of HEK293T cells transfected with Xp-STRAD and the indicated Flag-LKB1 cultured in the presence (+) or absence (-) of glucose for 2 hours were subjected to immunoblotting.

(E, F) Immunoprecipitates by anti-LKB1 antibody from cytosolic fractions of LKB1-deficient A549 cells (E) or *LKB1*-KO MEFs (F) with stable reconstitution of the indicated Flag-LKB1 were subjected to immunoblotting.

(G) Immunoprecipitates by anti-LKB1 antibody from cytosolic fractions of BT-474 cells with control (shLuc), Skp2 or LKB1 knockdown were subjected to immunoblotting.

(H) Immunoprecipitates by anti-LKB1 antibody from Hep3B cells with stable transduction of vector (Vec) or Skp2 were subjected to immunoblotting.

(I–K) HEK293 cells transfected with the indicated Flag-LKB1 (I), *LKB1*-KO MEFs with stable reconstitution of the indicated Flag-LKB1 (J), or HEK293 cells with control (shLuc), LKB1 or Skp2 knockdown (K) were subjected to nuclear/cytoplasmic fractionation followed by immunoblotting. Lamin B1 serves as a nuclear marker, and  $\alpha$ -tubulin serves as a cytoplasmic marker. WCE, whole cell extracts.

(L) LKB1-deficient A549 cells with stable reconstitution of vector (Vec) or the indicated Flag-LKB1 were subjected to immunofluorescence assay with anti-LKB1 antibody. Scale bar, 10 $\mu$ m.

(M) LKB1-deficient A549 cells with stable reconstitution of the indicated LKB1 treated with cycloheximide (CHX) for the indicated time points were subjected to immunoblotting.



Figure S5

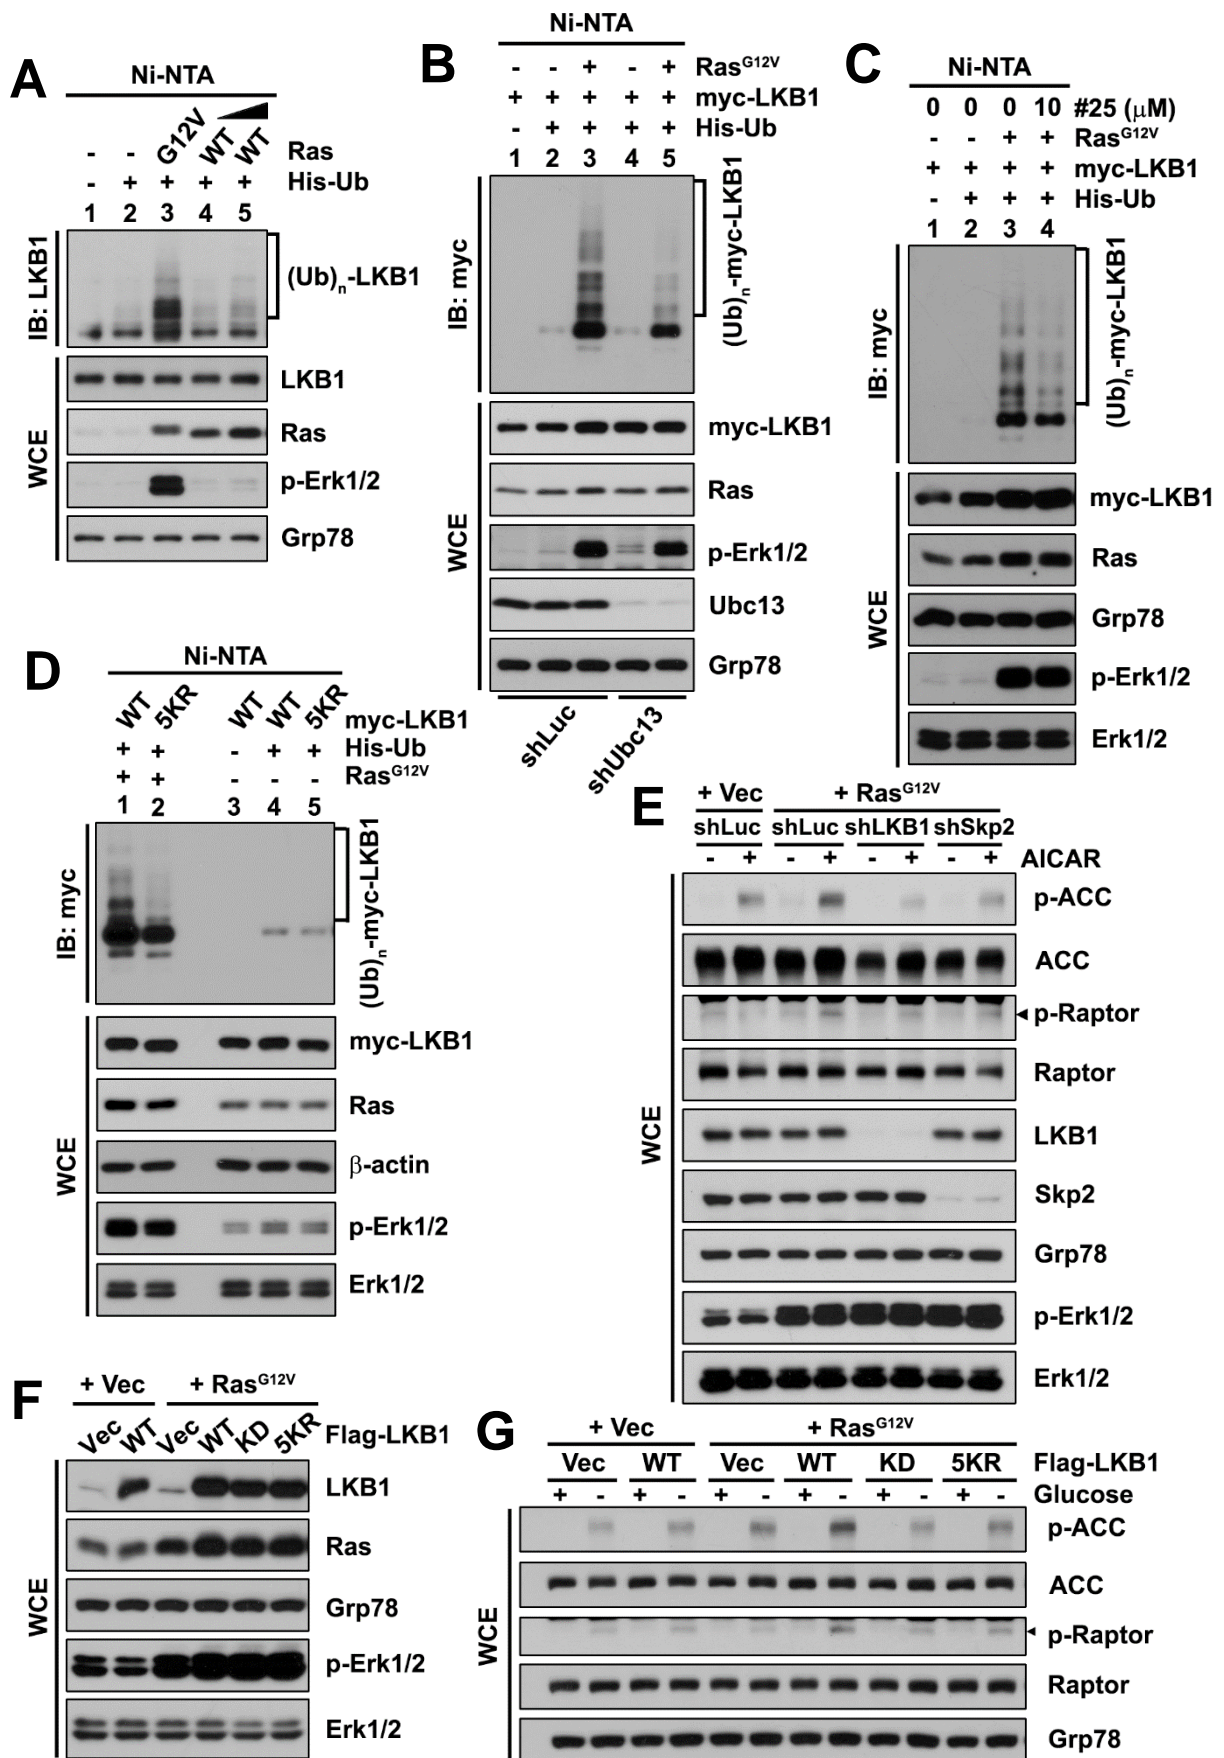

**Figure S5, related to Figure 5. Oncogenic Ras induces polyubiquitination of LKB1 and activation of the LKB1/AMPK signaling via Skp2.**

(A, B, D) *In vivo* ubiquitination assays in HEK293T cells (A and D) or HEK293T cells with control (shLuc) or Ubc13 knockdown (B) transfected with the indicated plasmids were followed by immunoblotting.

(C) *In vivo* ubiquitination assay in HEK293T cells transfected with the indicated plasmids after treatment with the Skp2 inhibitor (compound #25) at the indicated concentrations was followed by immunoblotting.

(E) Hep3B cells with stable transduction of vector (Vec) or H-Ras along with the indicated stable knockdown were subjected to treatment with 1mM AICAR for 2 hours, followed by immunoblotting.

(F) Hep3B cells with stable transduction of vector (Vec) or H-Ras together with the indicated Flag-LKB1 were subjected to immunoblotting.

(G) Hep3B cells as in (F) cultured in the presence (+) or absence (-) of glucose were subjected to immunoblotting.

Figure S6

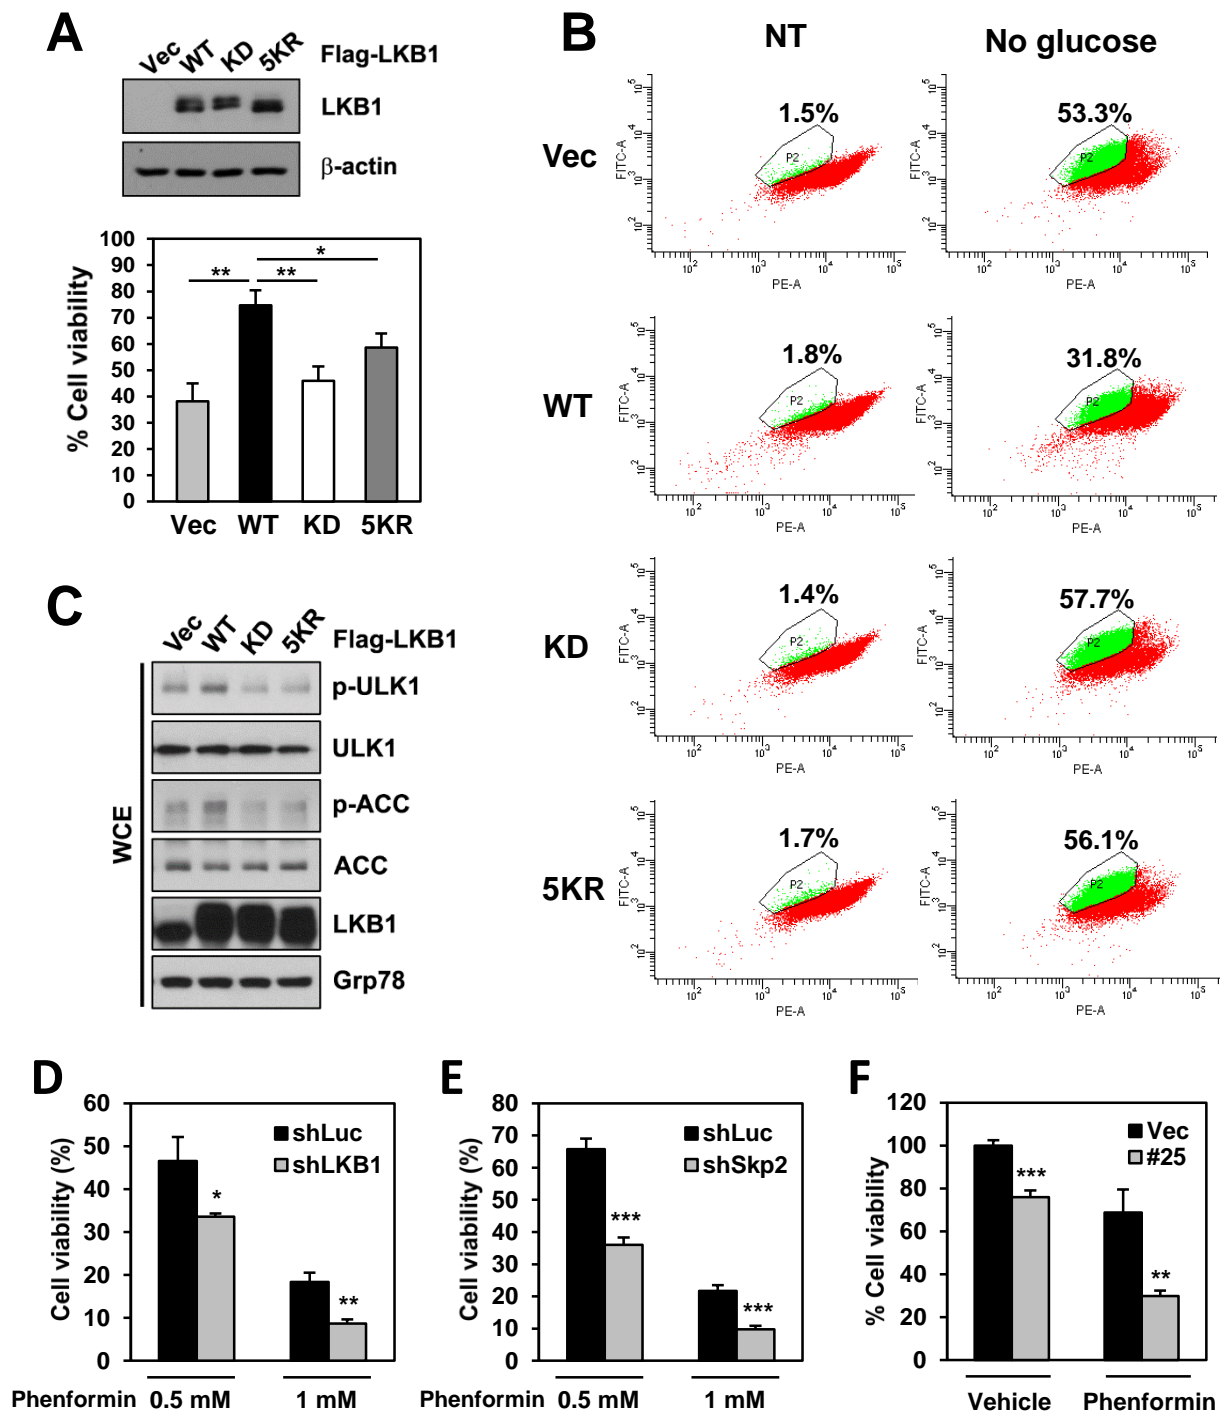

**Figure S6, related to Figure 6. Skp2-mediated polyubiquitination of LKB1 is critical for LKB1's function in cell survival under metabolic stress.**

(A) *LKB1*-KO MEFs stably restored with the indicated Flag-LKB1 were subjected to treatment with 2mM AICAR for 24 hours. Cell viability was determined by trypan blue exclusion assay, and is expressed as a percentage of the vehicle-treated controls. Whole cell extracts of the untreated MEFs were subjected to immunoblotting (upper panel).

(B) Representative flow cytometric dot plots of Figure 6B. Mitochondria of Hep3B cells with stable transduction of the indicated Flag-LKB1 cultured in the presence or absence of glucose were co-stained with MitoTracker Green (FITC) and MitoTracker Red (PE), followed by flow cytometric analysis. The damaged mitochondria (FITC-positive and PE-negative or low; P2 fraction) were quantitated, and the percentages are shown. NT, non-treated.

(C) Hep3B cells with stable transduction of the indicated Flag-LKB1 culture in the absence of glucose for 10 hours as in (B) were subjected to immunoblotting.

(D, E) Cell viability of Hep3B cells with control (shLuc), LKB1 (D) or Skp2 knockdown (E) after treatment with phenformin at the indicated concentrations for 3 days was determined by trypan blue exclusion assay, and is expressed as a percentage of the untreated controls.

(F) Cell viability of Hep3B cells after combined treatment with Skp2 inhibitor (compound #25) and phenformin for 3 days was determined by trypan blue exclusion assay, and is expressed as a percentage of the vehicle-treated controls.

Results are shown as means  $\pm$  s.d. ( $n=3$ ) (A and D–F). \* $P<0.05$ ; \*\* $P<0.01$ ; \*\*\* $P<0.005$ .

Figure S7

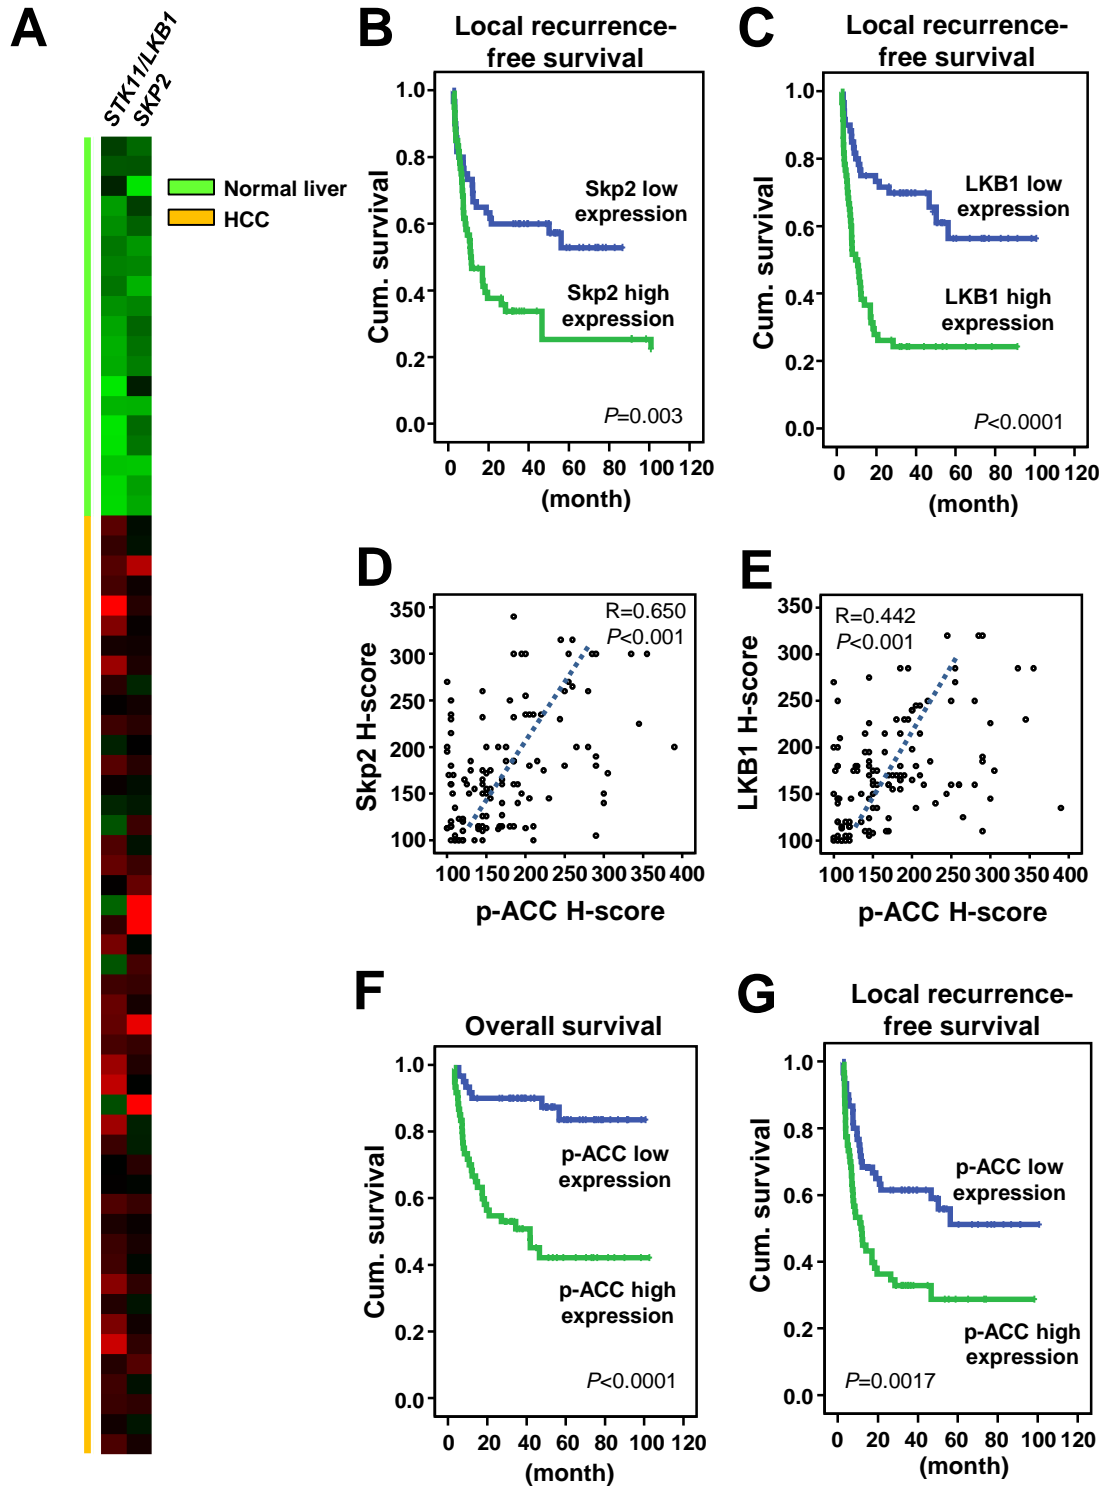

**Figure S7, related to Figure 7. Both LKB1 and Skp2 are overexpressed in HCC and their overexpression predicts poor survival outcomes.**

(A) The expression-profiling dataset of HCC tissues ( $n=47$ ) versus normal liver tissue ( $n=19$ ) from GSE14323 deposited in the Gene Expression Omnibus was analyzed. Both *LKB1* (*STK11*) and *SKP2* transcripts were significantly upregulated in HCC.

(B, C) Kaplan-Meier plots show that high expression of Skp2 (B) or LKB1 (C) significantly predicts poor local recurrence-free survival.

(D, E) Scatter plots of p-ACC levels versus Skp2 (D) or LKB1 (E) expression in HCC samples.

(F, G) Kaplan-Meier plots show that high p-ACC levels are significantly predictive for poor overall (F) or local recurrence-free (G) survival.

**Table S1. Correlations between SKP2 and STK11 expressions to various clinicopathologic parameters, related to Figures 7 and S7**

|                                    | No. | SKP2 H-score    | P-value           | STK11 H-score  | P-value           | pACC H-score    | P-value           |
|------------------------------------|-----|-----------------|-------------------|----------------|-------------------|-----------------|-------------------|
| <b>Sex</b>                         |     |                 | 0.063             |                | 0.725             |                 | 0.291             |
| Male                               | 93  | 169.18+/-56.94  |                   | 172.03+/-51.59 |                   | 172.48+/-63.27  |                   |
| Female                             | 27  | 200.74+/-74.70  |                   | 183.41+/-66.55 |                   | 190.00+/-73.78  |                   |
| <b>Age (years)</b>                 |     |                 | 0.914             |                | 0.882             |                 | 0.707             |
| <60                                | 53  | 172.06+/-49.43  |                   | 170.68+/-46.54 |                   | 178.09+/-63.94  |                   |
| ≥60                                | 67  | 179.63+/-71.29  |                   | 177.69+/-61.39 |                   | 175.10+/-67.80  |                   |
| <b>Hepatitis</b>                   |     |                 | 0.286             |                | 0.619             |                 | 0.100             |
| HBV                                | 57  | 167.28+/-53.11  |                   | 173.75+/-53.70 |                   | 177.14+/-63.66  |                   |
| HCV                                | 47  | 181.15+/-69.95  |                   | 175.89+/-60.63 |                   | 181.53+/-72.388 |                   |
| Both                               | 6   | 230.00+/-82.219 |                   | 200.00+/-48.89 |                   | 210.83+/-40.67  |                   |
| None                               | 10  | 172.50+/-51.87  |                   | 158.00+/-38.74 |                   | 127.70+/-29.55  |                   |
| <b>Pugh-Child's Classification</b> |     |                 | <b>&lt;0.001*</b> |                | <b>0.005*</b>     |                 | <b>0.011*</b>     |
| A                                  | 109 | 167.28+/-56.75  |                   | 169.28+/-51.68 |                   | 170.06+/-62.57  |                   |
| B                                  | 8   | 290.00+/-186.51 |                   | 250.00+/-55.36 |                   | 256.88+/-63.86  |                   |
| C                                  | 3   | 200.00+/-0.00   |                   | 166.67+/-45.37 |                   | 193.33+/-62.52  |                   |
| <b>AFP</b>                         |     |                 | <b>0.028*</b>     |                | <b>0.144</b>      |                 | 0.411             |
| <400                               | 83  | 163.59+/-57.30  |                   | 165.34+/-50.78 |                   | 167.16+/-56.99  |                   |
| ≥400                               | 31  | 186.32+/-53.75  |                   | 181.87+/-52.13 |                   | 186.19+/-76.52  |                   |
| <b>Tumor Multiplicity</b>          |     |                 | <b>&lt;0.001*</b> |                | <b>&lt;0.001*</b> |                 | <b>&lt;0.001*</b> |
| Solitary                           | 68  | 153.26+/-43.43  |                   | 156.38+/-42.64 |                   | 159.51+/-57.48  |                   |
| Multiple                           | 52  | 206.38+/-70.67  |                   | 198.40+/-60.86 |                   | 198.54+/-70.02  |                   |
| <b>Differentiation</b>             |     |                 | <b>0.003*</b>     |                | <b>0.031*</b>     |                 | <b>0.041*</b>     |
| Well/Moderately differentiated     | 93  | 166.94+/-58.22  |                   | 168.41+/-53.66 |                   | 169.63+/-62.57  |                   |
| Poorly differentiated              | 27  | 208.48+/-66.85  |                   | 195.89+/-56.18 |                   | 199.81+/-72.58  |                   |
| <b>Primary Tumor (pT)</b>          |     |                 | <b>0.003*</b>     |                | 0.083             |                 | 0.335             |
| pT1                                | 46  | 156.59+/-54.73  |                   | 163.52+/-55.99 |                   | 165.30+/-59.14  |                   |
| pT2                                | 39  | 174.05+/-59.92  |                   | 174.00+/-53.17 |                   | 174.03+/-59.29  |                   |
| pT3-4                              | 35  | 204.66+/-65.70  |                   | 189.80+/-54.37 |                   | 193.71+/-78.39  |                   |
| <b>AJCC Stage</b>                  |     |                 | <b>&lt;0.001*</b> |                | <b>0.012*</b>     |                 | 0.162             |
| Stage I                            | 44  | 150.07+/-46.20  |                   | 156.41+/-45.72 |                   | 159.75+/-54.17  |                   |
| Stage II                           | 39  | 174.05+/-59.92  |                   | 174.00+/-53.17 |                   | 174.03+/-59.29  |                   |
| Stage III-V                        | 37  | 209.81+/-67.49  |                   | 196.84+/-60.69 |                   | 198.78+/-79.16  |                   |
| <b>CLIP score</b>                  |     |                 | <b>0.005*</b>     |                | 0.097             |                 | <b>0.001*</b>     |
| 0-1                                | 85  | 166.27+/-59.25  |                   | 169.73+/-56.27 |                   | 165.07+/-61.91  |                   |
| 2-3                                | 35  | 200.60+/-64.20  |                   | 186.40+/-51.41 |                   | 204.00+/-67.90  |                   |
| <b>Okuda stage</b>                 |     |                 | <b>0.004*</b>     |                | 0.076             |                 | <b>0.013*</b>     |
| I                                  | 85  | 163.80+/-53.43  |                   | 167.38+/-49.95 |                   | 167.07+/-62.15  |                   |
| II-III                             | 35  | 206.60+/-72.56  |                   | 192.11+/-63.72 |                   | 199.14+/-69.93  |                   |
| <b>SKP2 Expression</b>             |     | -               |                   | r=0.675        | <b>&lt;0.001*</b> | <b>r=0.460</b>  | <b>&lt;0.001*</b> |
| <b>STK11 H-score</b>               |     |                 |                   |                |                   | <b>r=0.442</b>  | <b>&lt;0.001*</b> |

\*, statistically significant.

**Table S2. Univariate survival analyses, related to Figures 7 and S7**

| Parameter                          | No. of Case | OS        |                    | LRFS      |                    |
|------------------------------------|-------------|-----------|--------------------|-----------|--------------------|
|                                    |             | No. Event | P-value            | No. Event | P-value            |
| <b>Sex</b>                         |             |           |                    |           |                    |
| Male                               | 93          | 29        | 0.5670             | 53        | 0.3622             |
| Female                             | 27          | 11        |                    | 14        |                    |
| <b>Age (years)</b>                 |             |           |                    |           |                    |
| <60                                | 53          | 16        | 0.4994             | 25        | 0.1622             |
| ≥60                                | 67          | 24        |                    | 42        |                    |
| <b>Pugh-Child's Classification</b> |             |           |                    |           |                    |
| A                                  | 109         | 29        | <b>&lt;0.0001*</b> | 56        | <b>&lt;0.0001*</b> |
| B                                  | 8           | 8         |                    | 8         |                    |
| C                                  | 3           | 3         |                    | 3         |                    |
| <b>AFP</b>                         |             |           |                    |           |                    |
| <400                               | 83          | <b>20</b> | <b>0.0148*</b>     | 41        | <b>0.0820*</b>     |
| ≥400                               | 31          | 14        |                    | 20        |                    |
| <b>Tumor Multiplicity</b>          |             |           |                    |           |                    |
| Solitary                           | 68          | 9         | <b>&lt;0.0001*</b> | 26        | <b>&lt;0.0001*</b> |
| Multiple                           | 52          | 31        |                    | 41        |                    |
| <b>Differentiation</b>             |             |           |                    |           |                    |
| Well/Moderately differentiated     | 93          | 25        | <b>0.0010*</b>     | 47        | <b>0.0003*</b>     |
| Poorly differentiated              | 27          | 15        |                    | 20        |                    |
| <b>Primary Tumor (pT)</b>          |             |           |                    |           |                    |
| pT1                                | 46          | 7         | <b>0.0001*</b>     | 18        | <b>0.0003*</b>     |
| pT2                                | 39          | 14        |                    | 24        |                    |
| pT3-4                              | 35          | 19        |                    | 25        |                    |
| <b>AJCC Stage</b>                  |             |           |                    |           |                    |
| Stage I                            | 44          | 5         | <b>&lt;0.0001*</b> | 16        | <b>0.0001*</b>     |
| Stage II                           | 39          | 14        |                    | 24        |                    |
| Stage III-V                        | 37          | 21        |                    | 27        |                    |
| <b>CLIP score</b>                  |             |           |                    |           |                    |
| 0-1                                | 85          | 21        | <b>0.0001*</b>     | 41        | <b>&lt;0.0001*</b> |
| 2-3                                | 35          | 19        |                    | 26        |                    |
| <b>Okuda stage</b>                 |             |           |                    |           |                    |
| I                                  | 85          | 21        | <b>0.0002*</b>     | 44        | <b>0.0356*</b>     |
| II-III                             | 35          | 19        |                    | 23        |                    |
| <b>SKP2 Expression</b>             |             |           |                    |           |                    |
| Low expression (<median)           | 60          | 8         | <b>&lt;0.0001*</b> | 26        | <b>0.0030*</b>     |
| High expression (≥median)          | 60          | 32        |                    | 41        |                    |
| <b>STK11 Expression</b>            |             |           |                    |           |                    |
| Low expression (<median)           | 60          | 13        | <b>0.0040*</b>     | 22        | <b>&lt;0.0001*</b> |
| High expression (≥median)          | 60          | 27        |                    | 45        |                    |
| <b>pACC Expression</b>             |             |           |                    |           |                    |
| Low expression (<median)           | 60          | 8         | <b>&lt;0.0001*</b> | 26        | <b>0.0017*</b>     |
| High expression (≥median)          | 60          | 32        |                    | 41        |                    |

OS, overall survival; LRFS, local recurrence-free survival; \*, statistically significant.



**Table S3. Multivariate survival analyses, related to Figures 7 and S7**

| Parameter              | Category                       | OS    |              |                   | LRFS  |              |                   |
|------------------------|--------------------------------|-------|--------------|-------------------|-------|--------------|-------------------|
|                        |                                | RR    | 95% CI       | P-value           | RR    | 95% CI       | P-value           |
| <b>SKP2</b>            | Low expression (<median)       | 1     | -            | <b>&lt;0.001*</b> | 1     | -            | 0.148             |
|                        | High expression (≥median)      | 5.592 | 2.308-13.548 |                   | 1.499 | 0.866-2.594  |                   |
| <b>STK11</b>           | Low expression (<median)       | 1     | -            | 0.052             | 1     | -            | <b>&lt;0.001*</b> |
|                        | High expression (≥median)      | 2.017 | 0.955-4.087  |                   | 3.001 | 1.7738-5.181 |                   |
| <b>pACC</b>            | Low expression (<median)       | 1     |              | <b>0.036*</b>     | 1     | -            | <b>0.716</b>      |
|                        | Low expression (<median)       | 2.451 | 1.060-5.671  |                   | 1.109 | 0.636-1.932  |                   |
| <b>CLIP score</b>      | 0-1                            | 1     | -            | 0.060             | 1     | -            | <b>0.015*</b>     |
|                        | 2-3                            | 2.612 | 0.959-7.111  |                   | 2.683 | 1.210-5.950  |                   |
| <b>Okuda stage</b>     | I                              | 1     | -            | 0.646             | 1     | -            | 0.259             |
|                        | II-III                         | 1.234 | 0.503-3.029  |                   | 1.575 | 0.716-3.460  |                   |
| <b>AJCC Stage</b>      | Stage I                        | 1     | -            | <b>0.009*</b>     | 1     | -            | <b>0.006*</b>     |
|                        | Stage II                       | 4.028 | 1.426-11.381 |                   | 2.455 | 1.264-1.767  |                   |
|                        | Stage III-V                    | 4.985 | 1.429-14.375 |                   | 2.959 | 1.422-6.156  |                   |
| <b>Differentiation</b> | Well/Moderately differentiated | 1     | -            | 0.845             | 1     | -            | 0.249             |
|                        | Poorly differentiated          | 1.085 | 0.483-2.433  |                   | 1.453 | 0.769-2.746  |                   |

OS, overall survival; LRFS, local recurrence-free survival; \*, statistically significant.

## **SUPPLEMENTAL EXPERIMENTAL PROCEDURES**

### **Cell culture and reagents**

*WT* and *Skp2*-KO MEFs were prepared from mice as previously described (Lin et al., 2010). All manipulations were performed under Institutional Animal Care and Use Committee approval protocol. *LKB1*-KO MEFs were a kind gift from Dr. Nabeel Bardeesy (Harvard Medical School). Hep3B, BT-474, MCF-7, HEK293, HEK293T, HeLa, and A549 cells were obtained from American Type Culture Collection. BT-474 cells were cultured in RPMI medium supplemented with 10% fetal bovine serum (FBS), and all the other cells were cultured in DMEM supplemented with 10% FBS. For glucose deprivation, cells were washed with PBS once and then incubated in glucose-free DMEM (Invitrogen) supplemented with 10% dialyzed FBS (Sigma) for the indicated times. 2-deoxyglucose (2-DG), 5-aminoimidazole-4-carboxamide ribonucleotide (AICAR) and phenformin were purchased from Sigma.

### **Plasmids**

His<sub>6</sub>-ubiquitin (His-Ub), His<sub>6</sub>-ubiquitin-K48R (His-Ub-K48R), His<sub>6</sub>-ubiquitin-K63R (His-Ub-K63R), Xpress-Skp2 (Xp-Skp2), Xpress-Skp2-NES (Xp-Skp2-NES), Flag-Skp2 and pBabe-H-RasG12V constructs were described previously (Chan et al., 2012; Lin et al., 2010; Lin et al., 2009). pcDNA3-Flag-LKB1, pcDNA3-Flag-LKB1-KD (kinase-dead; K78I), pBabe-Flag-LKB1, pBabe-Flag-LKB1-KD, and pcDNA4-Xpress-STRAD (Xp-STRAD) constructs were purchased from Addgene. pET30a-AMPK $\alpha_{1-312}$  (His-AMPK $\alpha_{1-312}$ ) construct was a kind gift from Dr. Gary D. Lopaschuk (University of Alberta, Canada) (Altarejos et al., 2005). pSG-Flag-LKB1 constructs expressing various LKB1 fragments were kindly provided by Dr. Christelle Forcet (Institut de Génomique Fonctionnelle de Lyon, France) (Nony et al., 2003). pCIG2-HA-SAD-B was a kind gift from Dr. Franck Polleux (Columbia University Medical Center, New York) (Courchet et al., 2013). pcDNA3-HA-AMPK $\alpha_1$  and  $\alpha_2$  constructs were a kind gift from Dr. Kun-Liang Guan (University of California, San Diego) (Inoki et al., 2003). The LKB1 constructs including pCMV-myc-LKB1, pcDNA4-Xpress-LKB1 (Xp-LKB1 with various LKB1 fragments), pWZL-myc-LKB1 and pGEX-5X-1-LKB1 (GST-LKB1) were subcloned from pcDNA3-Flag-LKB1. All LKB1-K-to-R mutant constructs were generated from the WT LKB1 constructs by using a PCR-based site-directed mutagenesis method. To re-express LKB1, which cannot be targeted by LKB1 shRNA, in cells with stable LKB1 knockdown, silent mutations were generated on LKB1 constructs by using a PCR-based site-directed mutagenesis method.

### **Transfection and viral infection**

For transfection of HEK293 or HEK293T cells with exogenous plasmids, calcium phosphate transfection method was used. For control, Skp2, LKB1, Ubc13, Ubc5C, or MO25 knockdown,

the indicated cell lines were infected with lentiviruses packaged from HEK293T cells transfected with pLKO.1-puro-shRNA constructs (Sigma) and packaging plasmids (Chan et al., 2012). For transduction of vector, LKB1, LKB1-KD, LKB1-5KR or H-Ras, the indicated cell lines were infected with retroviruses packaged from HEK293T cells transfected with pBabe-puro constructs and packaging plasmids (Chen et al., 2011). The stably infected cells were selected by 1, 1.5 or 2 µg/ml puromycin for 3–7 days. The following lentiviral shRNAs (Sigma) were used: Skp2-lentiviral shRNA-1 (5'-GATAGTGTCATGCTAAAGAAT-3'), Skp2-lentiviral shRNA-2 (5'-GCCTAAGCTAAATCGAGAGAA-3'), LKB1-lentiviral shRNA (5'-CATCTACACTCAGGACTTCAC-3'), UbcH5c-lentiviral shRNA (5'-CCTGCATTATAGCTGGAATAA-3'), Ubc13-lentiviral shRNA (5'-CCTTCCAGAAGAATACCCAAT-3'), MO25-lentiviral shRNA (5'-GAGAAGTTACTTCATTCAGAA-3'), and Luciferase shRNA (as the control).

### **Immunoblotting, immunoprecipitation and antibodies**

For immunoblotting analysis, cells were lysed by direct resuspension in RIPA buffer (50mM Tris-HCl [pH 8.0], 150mM NaCl, 5mM EDTA, 0.5% sodium deoxycholate, 0.1% SDS, 1% (v/v) NP-40, 50mM NaF, 10mM sodium pyrophosphate, 10mM disodium glycerophosphate, protease inhibitor cocktail), and then clarified cell lysates were used. For immunoprecipitation, cells were lysed in RIPA buffer directly, or E1A buffer (50mM HEPES [pH 7.5], 250mM NaCl, 5mM EDTA, 0.1% (v/v) NP-40, protease inhibitor cocktail) followed by sonication. Clarified cell lysates were incubated with the indicated antibodies overnight, and then protein A/G beads (Santa Cruz Biotechnology) were added for 3–5 hours. Beads were washed four times with RIPA or E1A buffer. Proteins were eluted in SDS-sample buffer and subjected to immunoblotting analysis. For immunoprecipitation by anti-Lys63-specific ubiquitin antibody, cells were lysed in 6M urea lysis buffer (50mM Tris-HCl [pH 8.0], 300mM NaCl, 6M urea, 0.5% (v/v) NP-40, protease inhibitor cocktail) followed by sonication, and the concentration of urea in clarified cell lysates was diluted to 4M before addition of the antibody. Antibodies used in this study include: anti-LKB1, anti-ubiquitin, anti-Myc and anti-His from Santa Cruz Biotechnology; anti-Skp2, anti-Ubc13, anti-Xpress and anti-Cullin1 from Invitrogen; anti-phospho-ACC (Ser79), anti-ACC, anti-phospho-AMPKα (Thr172), anti-AMPKα, anti-Ubc5C, anti-MO25, anti-phospho-Erk1/2 (Thr202/Tyr204), anti-Erk1/2, anti-phospho-Raptor (Ser792), anti-Raptor, anti-phospho-ULK1 (Ser555) and anti-ULK1 from Cell Signaling; anti-Flag, anti-α-tubulin and anti-β-actin from Sigma; anti-Skp1 and anti-Grp78 from BD Transduction Laboratories; anti-pan-Ras from Calbiochem; anti-HA from Convance; anti-Lys63-specific ubiquitin (K63-Ub) from Millipore; anti-phospho-serine/threonine and anti-Lamin B1 from Abcam.

### ***In vitro* LKB1 kinase assay**

Recombinant His-AMPK $\alpha_{1-312}$  protein was expressed in BL21 bacteria and purified from the bacterial lysates using a nickel-agarose column to serve as LKB1's substrate. Endogenous LKB1 or exogenous Flag-LKB1 was immunoprecipitated from cells by antibodies against LKB1 or Flag, and then immunoprecipitates were incubated with recombinant His-AMPK $\alpha_{1-312}$  for 30 minutes at 30°C in 20  $\mu$ l of reaction buffer (25mM Tris-HCl [pH 7.5], 5mM  $\beta$ -glycerophosphate, 2mM DTT, 0.1mM Na<sub>3</sub>VO<sub>4</sub>, 10mM MgCl<sub>2</sub>, 0.5mM ATP). After incubation, proteins were eluted in SDS-sample buffer and subjected to immunoblotting analysis. LKB1 kinase activity was directly determined by measuring Thr172 phosphorylation of recombinant AMPK $\alpha_{1-312}$  using anti-phospho-AMPK $\alpha$  (Thr172) antibody.

### ***In vivo* and *in vitro* ubiquitination assay**

*In vivo* and *in vitro* ubiquitination assays were performed as described previously (Chan et al., 2012; Yang et al., 2009). For the *in vivo* ubiquitination assay, HEK293T or HEK293 cells were transfected with His-Ub and the indicated plasmids for 48 hours and lysed using high-stringency denaturing buffer (6M guanidine-HCl, 0.1M Na<sub>2</sub>HPO<sub>4</sub>/NaH<sub>2</sub>PO<sub>4</sub>, and 10mM imidazole at pH 8.0). The cell extracts were then incubated with nickel-agarose beads for 3 hours, washed, and subjected to immunoblotting analysis. For the *in vitro* ubiquitination assay, recombinant GST-LKB1 protein was expressed in BL21 bacteria and purified from the bacterial lysates using glutathione beads. SCF/Flag-Skp2 complex was expressed in HEK293T cells, immunoprecipitated using anti-Flag antibody, and eluted from protein A/G beads using Flag peptides according to the manufacturer's standard procedures (Sigma). Purified GST-LKB1 and SCF/Flag-Skp2 proteins were incubated for 3 hours at 37°C in 20  $\mu$ l of reaction buffer (20mM HEPES [pH 7.4], 10mM MgCl<sub>2</sub>, 1mM DTT, 59mM ubiquitin, 50nM E1, 850nM Ubc13/Uev1a, and 1mM ATP). After incubation, protein mixtures were diluted in RIPA buffer and the supernatant fluid was immunoprecipitated overnight with anti-LKB1 antibody, after which protein A/G beads were added for an additional 3 hours. Beads were washed four times with RIPA buffer. Proteins were eluted in SDS-sample buffer and subjected to immunoblotting analysis.

### **Preparation of cytosolic and nuclear fractions**

Cells were harvested and resuspended in hypotonic buffer (10mM Tris-HCl [pH 7.6], 10mM MgCl<sub>2</sub>, 0.1% (v/v) NP-40, protease inhibitor cocktail) followed by Dounce homogenization. The suspensions were centrifuged at 1,300 x g for 5 minutes at 4°C, and then the resulting supernatants and nuclear pellets were further processed for cytosolic and nuclear fractions, respectively. For cytosolic fractions, the supernatants were clarified by centrifugation at 13,500 rpm for 15 minutes at 4°C. For further immunoprecipitation, the concentration of NP-40 in the

cytosolic fractions was adjusted from 0.1% to 1% (comparable to the NP-40 concentration in RIPA buffer). For nuclear fractions, the nuclear pellets were washed once with hypotonic buffer and then resuspended in RIPA buffer followed by sonication and centrifugation.

### **Immunofluorescence assay**

Cells were fixed with 4% paraformaldehyde/PBS for 10–15 minutes and then permeabilized with 0.2% Triton X/PBS for 15 minutes at room temperature. The primary antibody against LKB1 (Ley 37D/G6; Abcam) was diluted in 1% BSA/PBS. The fluorescent-conjugated secondary antibody was anti-mouse Alexa Fluor 594. Coverslips were washed three times with PBS between antibody incubations. The nuclei were stained with DAPI contained in a mounting solution.

### **Cell viability assay**

For *Skp2*-KO and *LKB1*-KO MEFs, viable and dead cells were counted directly under the microscope using the trypan blue exclusion assay. For glucose-starved A549 and Ras-overexpressing Hep3B cells, cell death was measured using DAPI staining as previously described (Jeon et al., 2012). Briefly, cells were seeded at a low density in 12-well plates in triplicates overnight and then subjected to glucose deprivation. The treated cells were fixed by directly adding formaldehyde (final concentration 12%) to the culture medium. After overnight fixation at 4°C, the cells were stained with DAPI (1 µg/ml) for 5 minutes, and then washed and left in PBS. Under the fluorescence microscope, compared with the untreated cells, the treated cells with condensed or fragmented nuclei were counted as dead cells. For administration of phenformin or/and the Skp2 inhibitor (compound #25),  $1.2\text{--}1.5 \times 10^4$  of cell were seeded in 12-well plates in triplicates for 24 hours and then treated with the indicated drug(s) at the indicated concentrations for 3 days. Drugs were refreshed once after treatment for 2 days. Viable cells were counted under the microscope using the trypan blue exclusion assay.

### **Detection of damaged mitochondria**

Mitochondria were analyzed by MitoTracker staining followed by flow cytometry analysis as described previously (Tal et al., 2009). Cells were co-stained with MitoTracker Green (for total mitochondria) and MitoTracker Red (for live or respiring mitochondria) at 50 nM and 100 nM, respectively, in the culture medium for 20–30 minutes at 37°C. After staining, the cells were washed, harvested and then resuspended in PBS for flow cytometry analysis. The FITC-positive and PE-negative/low populations were gated as defective mitochondria. The MitoTracker probes were purchased from Invitrogen.

## SUPPLEMENTAL REFERENCES

- Altarejos, J. Y., Taniguchi, M., Clanachan, A. S., and Lopaschuk, G. D. (2005). Myocardial ischemia differentially regulates LKB1 and an alternate 5'-AMP-activated protein kinase kinase. *J Biol Chem* *280*, 183-190.
- Chan, C. H., Li, C. F., Yang, W. L., Gao, Y., Lee, S. W., Feng, Z., Huang, H. Y., Tsai, K. K., Flores, L. G., Shao, Y., *et al.* (2012). The Skp2-SCF E3 ligase regulates Akt ubiquitination, glycolysis, herceptin sensitivity, and tumorigenesis. *Cell* *149*, 1098-1111.
- Chen, C. H., Shaikenov, T., Peterson, T. R., Aimbetov, R., Bissenbaev, A. K., Lee, S. W., Wu, J., Lin, H. K., and Sarbassov dos, D. (2011). ER stress inhibits mTORC2 and Akt signaling through GSK-3beta-mediated phosphorylation of rictor. *Sci Signal* *4*, ra10.
- Courchet, J., Lewis, T. L., Jr., Lee, S., Courchet, V., Liou, D. Y., Aizawa, S., and Polleux, F. (2013). Terminal axon branching is regulated by the LKB1-NUAK1 kinase pathway via presynaptic mitochondrial capture. *Cell* *153*, 1510-1525.
- Inoki, K., Zhu, T., and Guan, K. L. (2003). TSC2 mediates cellular energy response to control cell growth and survival. *Cell* *115*, 577-590.
- Jeon, S. M., Chandel, N. S., and Hay, N. (2012). AMPK regulates NADPH homeostasis to promote tumour cell survival during energy stress. *Nature* *485*, 661-665.
- Lin, H. K., Chen, Z., Wang, G., Nardella, C., Lee, S. W., Chan, C. H., Yang, W. L., Wang, J., Egia, A., Nakayama, K. I., *et al.* (2010). Skp2 targeting suppresses tumorigenesis by Arf-p53-independent cellular senescence. *Nature* *464*, 374-379.
- Lin, H. K., Wang, G., Chen, Z., Teruya-Feldstein, J., Liu, Y., Chan, C. H., Yang, W. L., Erdjument-Bromage, H., Nakayama, K. I., Nimer, S., *et al.* (2009). Phosphorylation-dependent regulation of cytosolic localization and oncogenic function of Skp2 by Akt/PKB. *Nat Cell Biol* *11*, 420-432.
- Nony, P., Gaude, H., Rossel, M., Fournier, L., Rouault, J. P., and Billaud, M. (2003). Stability of the Peutz-Jeghers syndrome kinase LKB1 requires its binding to the molecular chaperones Hsp90/Cdc37. *Oncogene* *22*, 9165-9175.
- Tal, M. C., Sasai, M., Lee, H. K., Yordy, B., Shadel, G. S., and Iwasaki, A. (2009). Absence of autophagy results in reactive oxygen species-dependent amplification of RLR signaling. *Proc Natl Acad Sci U S A* *106*, 2770-2775.
- Yang, W. L., Wang, J., Chan, C. H., Lee, S. W., Campos, A. D., Lamothe, B., Hur, L., Grabiner, B. C., Lin, X., Darnay, B. G., and Lin, H. K. (2009). The E3 ligase TRAF6 regulates Akt ubiquitination and activation. *Science* *325*, 1134-1138.
